# Supplementary material for: A novel CpG-based signature for survival prediction of lung adenocarcinoma patients
Source: PubMed Central journal article supplement — Exp Ther Med. 2019 Nov 15;19(1):280–6. doi: 10.3892/etm.2019.8200 (PMC6909784; doi:10.3892/etm.2019.8200), 2019-11-15

Figure S1. Texture feature selection using the LASSO binary logistic regression model. (A) Tuning parameter (Lambda) selection in the LASSO model used 10-fold cross-validation via minimum criteria. (B) LASSO coefficient profiles of the texture features. A coefficient profile plot was produced against the log (Lambda) sequence. LASSO, least absolute shrinkage and selection operator.

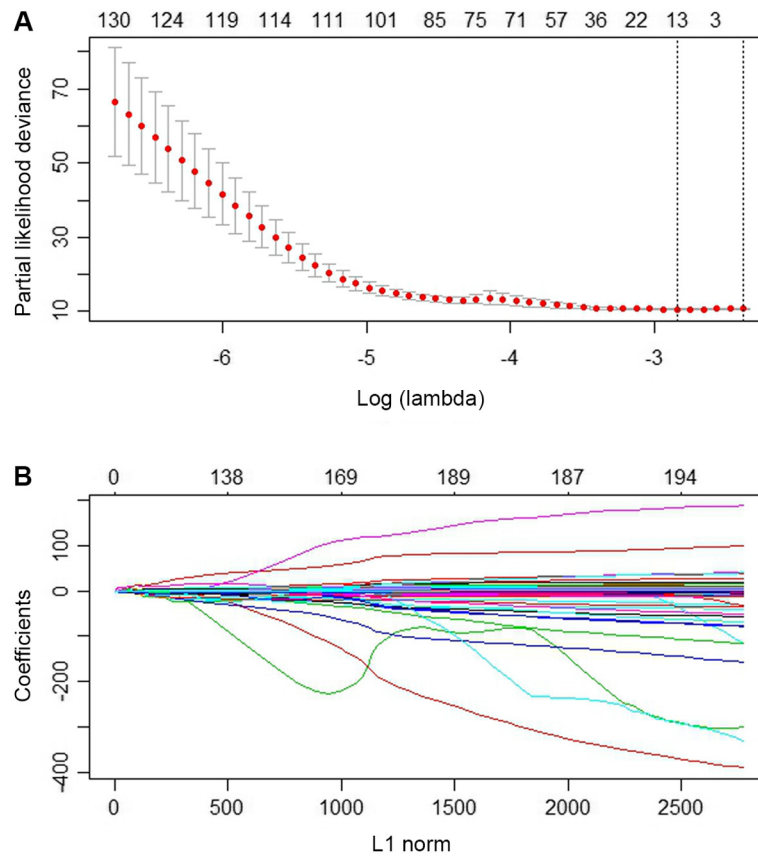

Figure S2. Significantly enriched pathways. The x-axis represents the number of genes accumulated in the pathways. Darker color indicates higher significance (smaller P-value). hsa, *Homo sapiens*; ECM extracellular matrix.

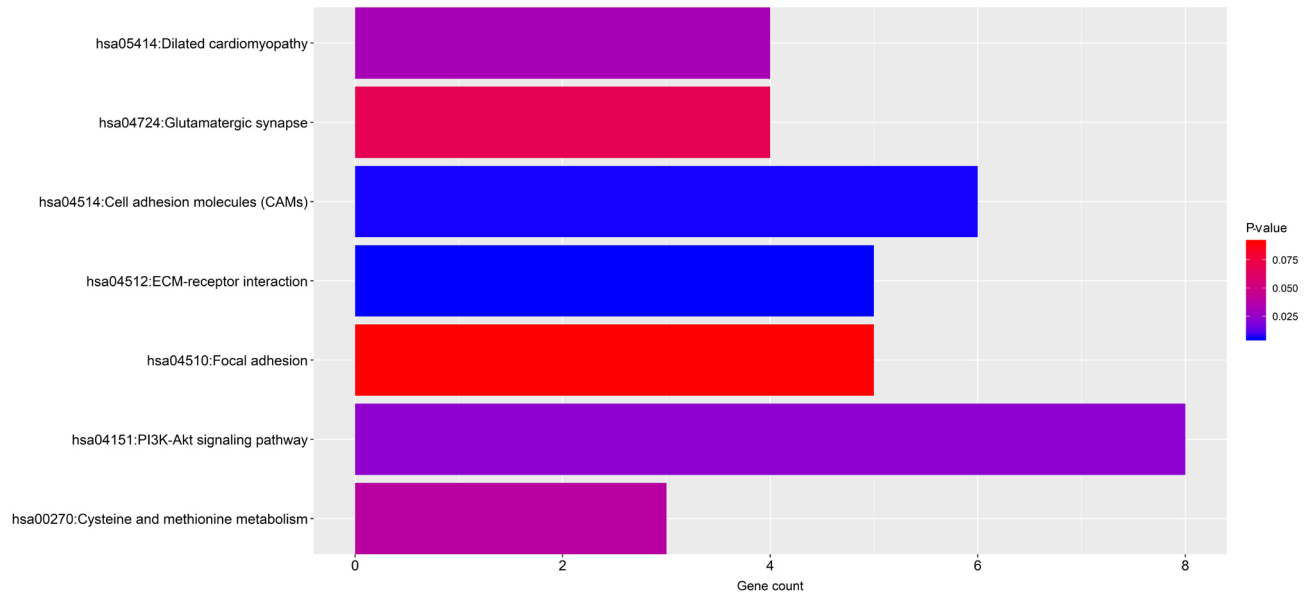

Supplement: Supplementary_Data.pdf [file Supplementary_Data.pdf]
